# Supplementary material for: Identification and characterization of piperine synthase from black pepper, Piper nigrum L
Source: PubMed Central journal article supplement (PMC8032705; doi:10.1038/s42003-021-01967-9), 2021-04-08
Supplement: 42003_2021_1967_MOESM2_ESM.pdf [file 42003_2021_1967_MOESM2_ESM.pdf]

**Supplementary Figures S1-S5**

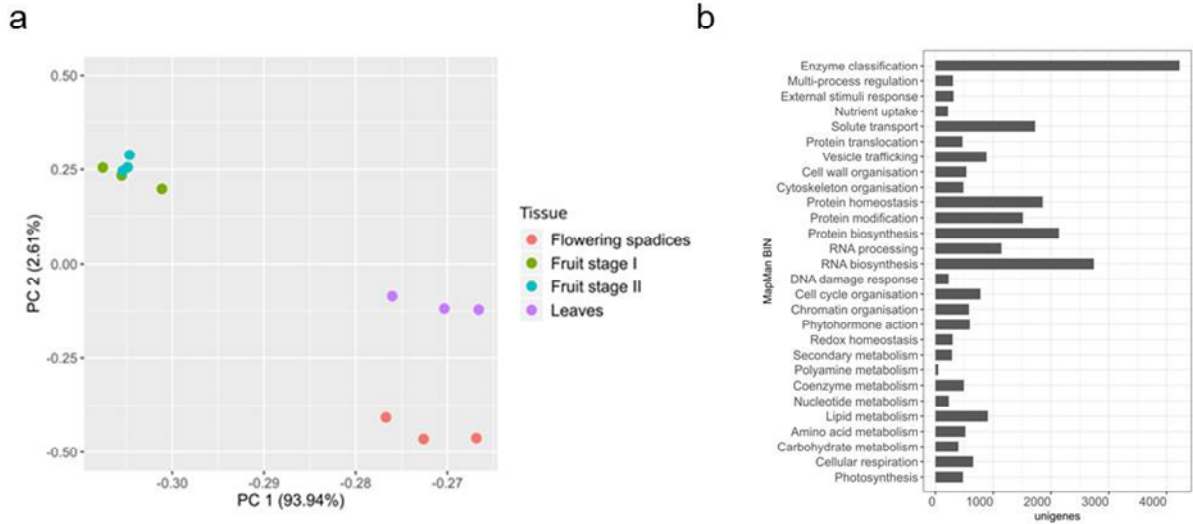

**Supplementary Fig. S1: Principal component analysis and MapMan-based distribution<sup>27</sup> of transcripts.** **a** Principal Component Analysis (PCA) was applied to 12 samples and 166,017 *Trinity* features using transformed gene expression data (counts per million). The first two principal components (PC) accounted for 96.56% of the total variance and identified three different clusters of leaf, spadices and fruit samples. PC1 accounted for 93.94% of the total variance and separates fruit sample from non-fruit samples. The high proportion of the captured variance in PC1 indicates large disparities in gene expression between fruits and all other black pepper tissues; **b** Distribution of functional categories of the transcript assembly comprising 208,307 transcript sequences. De-novo assembled sequences were annotated by Mercator/MapMan4 plant specific ontology. Unassigned (BIN 35) sequences were removed.

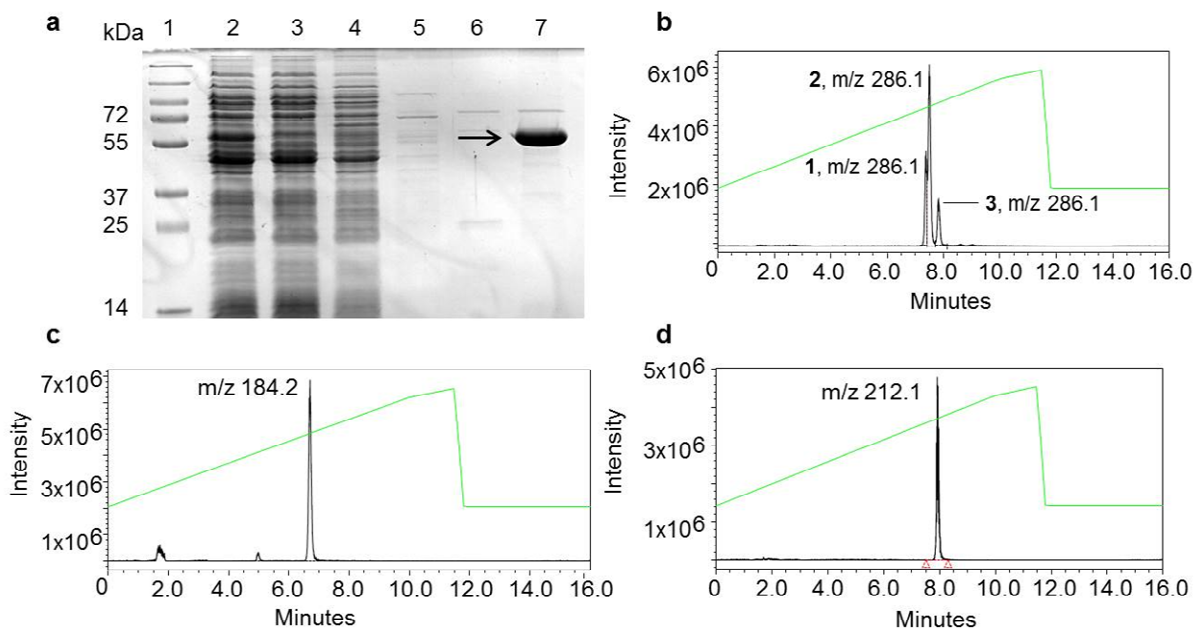

**Supplementary Fig. S2: Purification and specificity of recombinant piperamide synthase.** **a** The recombinant enzyme (marked by an arrow) was purified by affinity chromatography. **b** Product formation with piperoyl-CoA and piperidine; **c** Product formation with hexanoyl CoA and piperidine; **d** Product formation with octanoyl CoA and piperidine. Whereas in the case of piperoyl-CoA a mixture of three piperine isomers were detected by LC-UV/Vis and LC-ESI-MS detection (1, 2, and piperine marked as 3), a single product was produced in the case of hexanoyl-CoA (**c**), and octanoyl-CoA (**d**) identified as hexanoylpiperidine and octanoylpiperidine, respectively based on the corresponding mass signals at  $m/z$  184.2  $[M+H]^+$  and  $m/z$  212.1  $[M+H]^+$ .

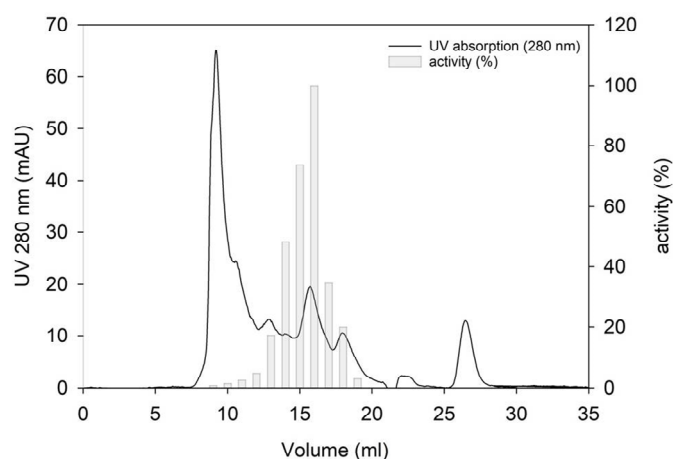

**Supplementary Fig. S3: Size exclusion chromatography of a partly purified piperine synthase preparation.** A Superdex 200 Increase 30/100 column (Cytiva, Freiburg, Germany) at a flow rate of 0.35 ml/min was used to correlate enzyme activity with molecular mass. Active, recombinant piperine synthase elutes after 16 ml as a monomer of ~ 50 kDa. Activity is marked by grey bars. No activity is observed with enzymes of higher, oligomeric states. Buffer includes 10 % glycerol, 150 mM NaCl, 1 mM DTT and 20 mM potassium phosphate at pH 7.5.

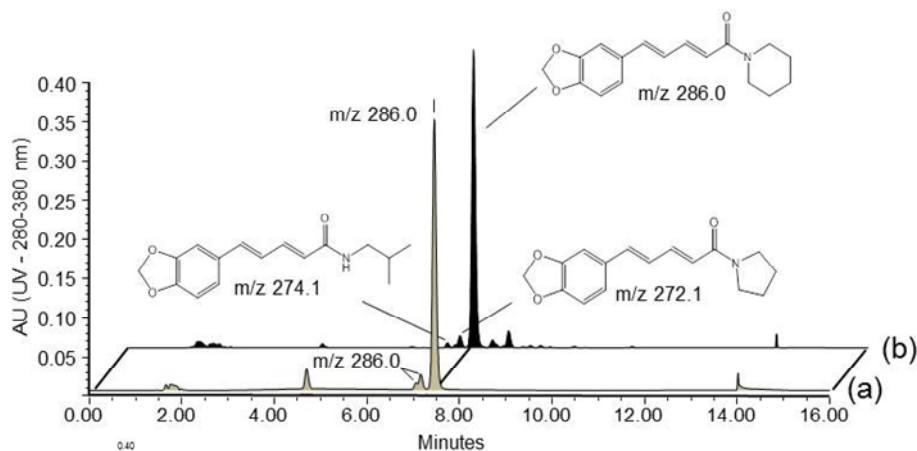



## Supplementary Tables

**Supplementary Table S1** Most abundant fruit stage I and stage II transcripts illustrate the rapid rise of specialized metabolism. The overall most abundant transcript in the fruit encoded a BURP-protein of unknown function. The terpene synthase 10-like transcript of specialized metabolism ranked number 5 of all transcripts identified at stage II of fruit development. This indicates the strong initiation of pathways of specialized metabolism at the onset of piperine accumulation. Transcripts encoding piperine synthase and piperamide synthase, both among the Top 5 candidates (green) are highlighted in bold. (\*tpm = transcripts/million).

| No.      | Trinity ID                   | sprot_blastX - based annotation             | Stage I tpm* | Stage II tpm* |
|----------|------------------------------|---------------------------------------------|--------------|---------------|
| Top      | TRINITY_DN56430_c3_g3        | BURP domain-containing protein 3            | 14781        | 17785         |
| 1        | TRINITY_DN49139_c0_g3        | Terpene synthase 10                         | 199          | 1091          |
| <b>2</b> | <b>TRINITY_DN43391_c4_g4</b> | <b>BAHD - Piperine Synthase</b>             | <b>194</b>   | <b>699</b>    |
| 3        | TRINITY_DN53695_c0_g9        | Cheilanthifoline synthase                   | 157          | 549           |
| 4        | TRINITY_DN60552_c4_g3        | Chalcone synthase 3-like                    | 648          | 476           |
| <b>5</b> | <b>TRINITY_DN43391_c4_g1</b> | <b>BAHD - Piperamide Synthase</b>           | <b>121</b>   | <b>464</b>    |
| 6        | TRINITY_DN53695_c0_g2        | (S)-canadine synthase                       | 127          | 444           |
| 7        | TRINITY_DN58395_c1_g1        | Acyl-coenzyme A oxidase 4                   | 164          | 411           |
| 8        | TRINITY_DN53669_c1_g4        | Benzyl alcohol O-benzoyltransferase         | 116          | 351           |
| 9        | TRINITY_DN43391_c4_g5        | Benzyl alcohol O-benzoyltransferase         | 113          | 333           |
| 10       | TRINITY_DN51211_c1_g2        | Alpha-terpineol synthase, chloroplastic     | 108          | 328           |
| 11       | TRINITY_DN42232_c1_g1        | Adenylate isopentenyltransferase 3          | 336          | 328           |
| 12       | TRINITY_DN53669_c1_g1        | Benzyl alcohol O-benzoyltransferase         | 100          | 288           |
| 13       | TRINITY_DN60552_c3_g1        | Chalcone synthase 3                         | 91           | 282           |
| 14       | TRINITY_DN52087_c0_g2        | Beta-cubebene synthase                      | 98           | 270           |
| 15       | TRINITY_DN52087_c0_g1        | 5-epi-aristolochene synthase 2              | 158          | 232           |
| 16       | TRINITY_DN60552_c4_g2        | Chalcone synthase 2                         | 271          | 221           |
| 17       | TRINITY_DN58865_c2_g2        | Probable terpene synthase 3                 | 210          | 210           |
| 18       | TRINITY_DN44102_c0_g1        | Flavanone 3-dioxygenase                     | 190          | 190           |
| 19       | TRINITY_DN59185_c3_g1        | Probable terpene synthase 3                 | 169          | 190           |
| 20       | TRINITY_DN58916_c2_g1        | Chalcone synthase                           | 177          | 184           |
| 21       | TRINITY_DN53695_c0_g5        | Cheilanthifoline synthase                   | 50           | 183           |
| 22       | TRINITY_DN43338_c0_g1        | Ornithine decarboxylase                     | 128          | 160           |
| 23       | TRINITY_DN60936_c1_g3        | 3-oxoacyl-[acyl-carrier-protein] synthase I | 47           | 155           |
| 24       | TRINITY_DN41616_c1_g1        | Chalcone synthase 2                         | 57           | 152           |
| 25       | TRINITY_DN59185_c3_g3        | 5-epi-aristolochene synthase 2              | 44           | 134           |
| 26       | TRINITY_DN59201_c1_g1        | Dihydroflavonol 4-reductase                 | 147          | 130           |
| 27       | TRINITY_DN59329_c3_g1        | Cytochrome P450 84A1 - FAH                  | 102          | 105           |
| 28       | TRINITY_DN44102_c0_g2        | Naringenin,2-oxoglutarate 3-dioxygenase     | 109          | 100           |
| 29       | TRINITY_DN48128_c4_g1        | Anthocyanidin reductase                     | 137          | 95            |
| 30       | TRINITY_DN58865_c2_g3        | Beta-cubebene synthase                      | 50           | 67            |

**Supplementary Table S2** Primers for cloning and qRT-PCR of piperine synthase and piperamide synthase.

| <b>Primer annotation</b>           | <b>Sequence</b>                                  |
|------------------------------------|--------------------------------------------------|
| Piperine synthase forward          | 5'- CATCATATGGCGCCTTCTTCTCAACTTG -3'             |
| Piperine synthase reverse          | 5'- CATGGATCCTTACATGCGGGAAAGGTATCCATC -3'        |
| Piperamide synthase forward        | 5'- CAT <b>CATATGG</b> CCTTCTTCTCAGCTCGAATTC -3' |
| Piperamide synthase reverse        | 5'- CATGGATCCTTACATGCGGGACATGTACCCATG -3'        |
| qP-BAHD1-for (Piperamide synthase) | 5'- GAAAGCGGCAACCTCCTTTG -3'                     |
| qP-BAHD1-rev (Piperamide synthase) | 5'- AACTTGGTCCGGGAGTTGAC-3'                      |
| qP-BAHD2-for (Piperine synthase)   | 5'- TTGGCGATATCGGAGCACTC-3'                      |
| qP-BAHD2-rev (Piperine synthase)   | 5'- CGATCCCGCCGCAAATAAAG -3'                     |
| qP-eIF2B-for                       | 5'- CAATGCTTGAAGGGCAGTCG -3'                     |
| qP-eIF2B-rev                       | 5'- AACACAGATGCAGCTCCCAA -3'                     |
