# Supplementary material for: Identification and characterization of piperine synthase from black pepper, Piper nigrum L
Source: PubMed Central journal article supplement (PMC8032705; doi:10.1038/s42003-021-01967-9), 2021-04-08
Supplement: 42003_2021_1967_MOESM3_ESM.pdf [file 42003_2021_1967_MOESM3_ESM.pdf]

## **Description of Additional Supplementary Files**

**File name:** Supplementary Data 1

**Description:** Sequence information of all genes aligned in Figure 6.
